# Supplementary material for: The ERdj5-Sel1L complex facilitates cholera toxin retrotranslocation
Source: PubMed Central journal article supplement — Mol Biol Cell. 2013 Mar 15;24(6):785–95. doi: 10.1091/mbc.E12-07-0522 (PMC3596249; doi:10.1091/mbc.e12-07-0522), 2013-03-15

## The ERdj5-Sel1L complex facilitates cholera toxin retro-translocation

Jeffrey M. Williams<sup>1</sup>, Takamasa Inoue<sup>1</sup>, Lindsey Banks<sup>2</sup>, and Billy Tsai<sup>1\*</sup>

### Supplementary Figure Legends

**Figure S1.** ERdj5s binds to Sel1L. As in 4B, except WT ERdj5s-FLAG is used.

**Figure S2.** The BiP-Sel1L (1-372) interaction does not require ERdj5. (A) As in 4E, except fractions #27 and #32 are shown. (B) Cells transfected with scrambled or ERdj5 #1 siRNA were co-transfected with vector or S/His-Sel1L (1-372). Cells were subsequently permeabilized with 0.02% digitonin, centrifuged, and the pellet solubilized with 1% Triton X-100. The resulting lysates were incubated with S-antibody conjugated beads and the immunoprecipitates subjected to SDS-PAGE followed by immunoblotting with the indicated antibodies.

**Figure S3.** EDEM1 and OS-9 knockdown do not affect CTA1 retro-translocation. (A) As in 1A, except cells were transfected with either an EDEM1- or a mixture of two OS-9 specific siRNAs in which each siRNA is targeted against OS-9.1 and OS-9.2 (OS-9 #1 and #2 siRNAs). The antibody used to detect OS-9 (Abcam) preferentially recognizes OS-9.2 over OS-9.1. (B) As in 1C, except cells were transfected with either an EDEM1- or a mixture of OS-9 #1 and #2 siRNAs. (C) Quantification of the CTA1 band intensity in B was performed as in 1D.

Figure S1. ERdj5s binds to Sel1L

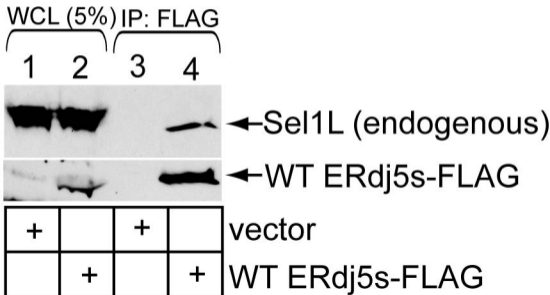

Figure S2. The BiP-Sel1L (1-372) interaction does not require ERdj5

A.

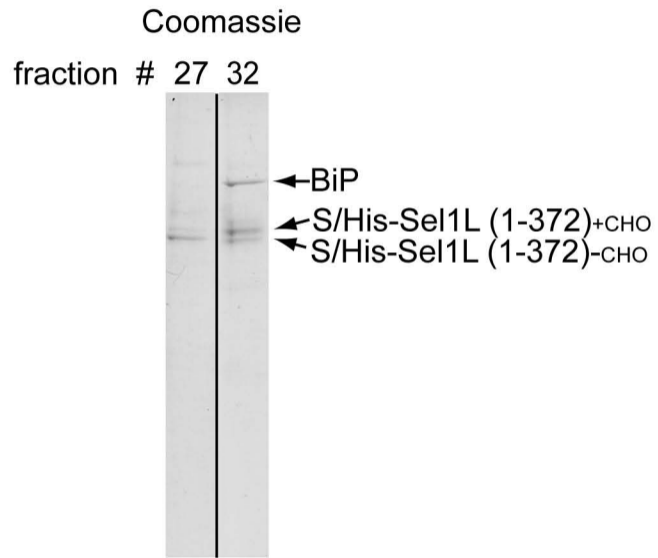

B.

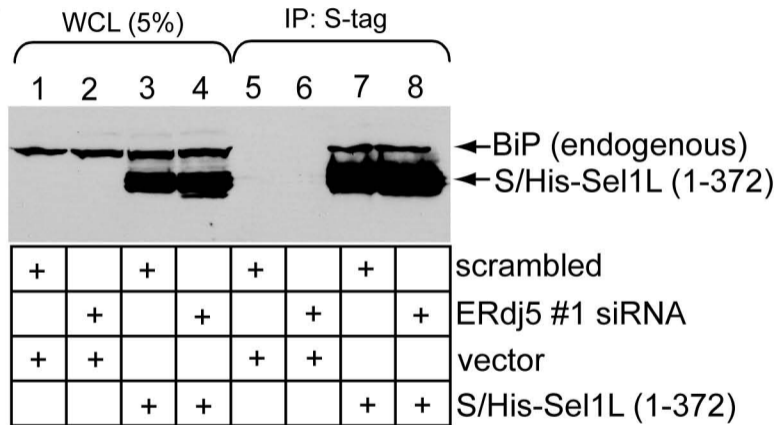

Figure S3. EDEM1 and OS-9 knockdown do not affect CTA1 retro-translocation

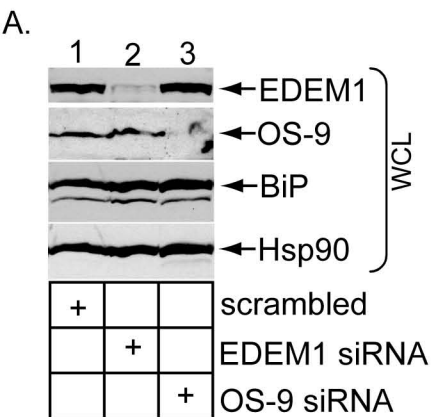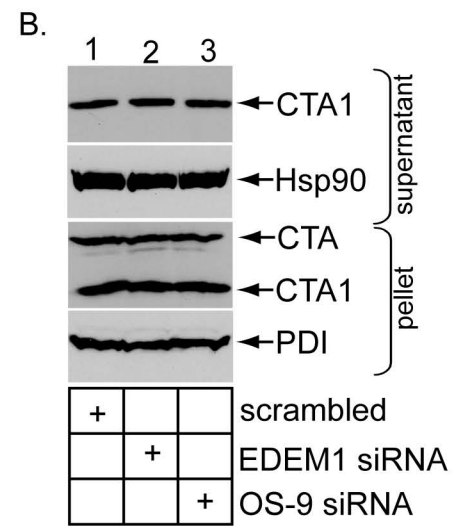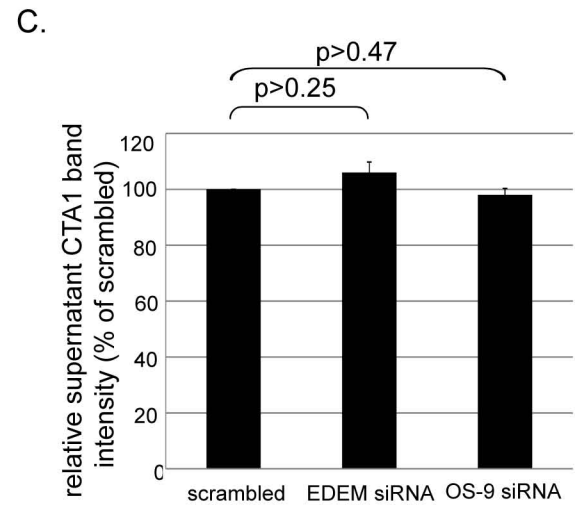

Supplement: supp_E12-07-0522_CombinedSupMats.pdf [file supp_E12-07-0522_CombinedSupMats.pdf]
